# Supplementary material for: miR-365b regulates the development of non-small cell lung cancer via GALNT4
Source: PubMed Central journal article supplement — Exp Ther Med. 2020 Jun 10;20(2):1637–43. doi: 10.3892/etm.2020.8857 (PMC7388555; doi:10.3892/etm.2020.8857), 2020-06-10

Figure S1. Expression levels of (A) miR-365b and (B) GALNT4 following transfection with si-GALNT4 or NC-siR. \*\*\* $P < 0.001$ , \*\* $P < 0.01$  vs. si-NC. GALNT4, N-acetylgalactosaminyltransferase 4; miR-365b, microRNA-365b; si-GALNT4, small interfering RNA targeting GALNT4; NC-siR, negative control siRNA.

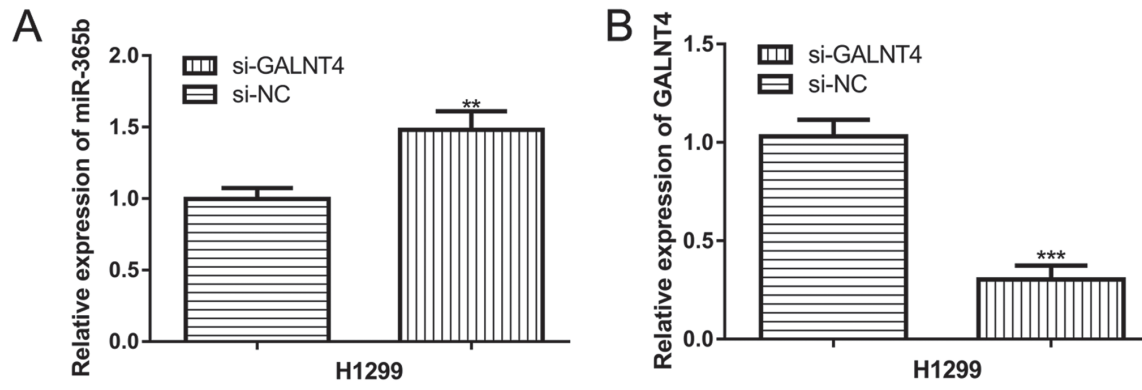

Figure S2. Effects of pGALNT4 transfection on (A) GALNT4 expression, (B) A549 and (C) H1299 cell proliferation. \*\*\*P<0.001 vs. pcDNA3.1. GALNT4, N-acetylgalactosaminyltransferase 4; OD, optical density.

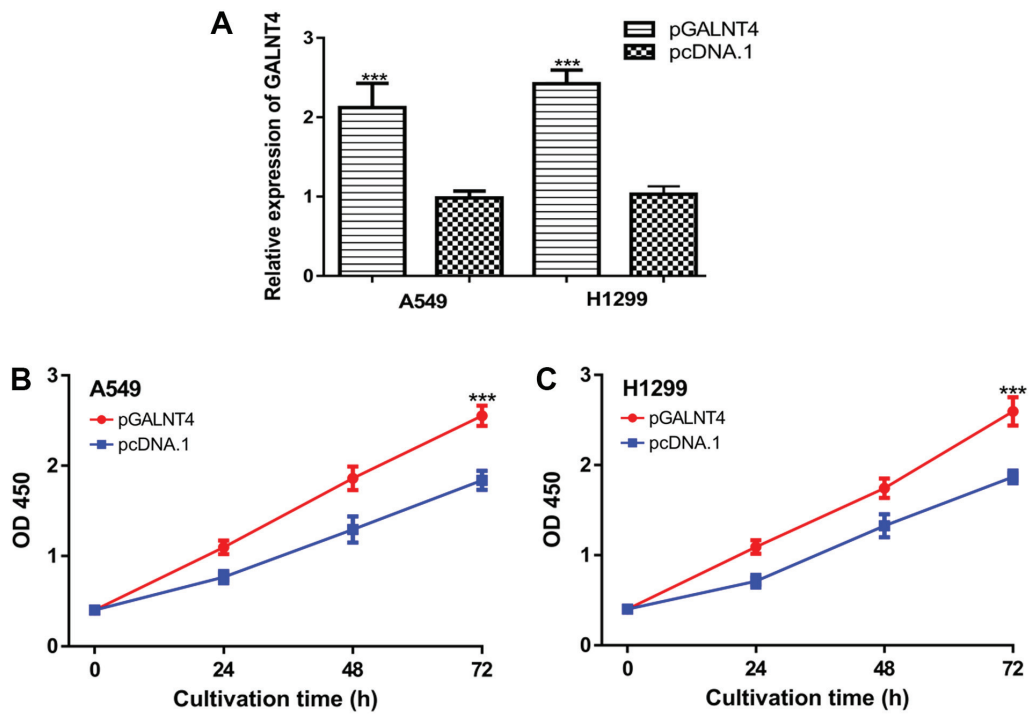

Supplement: Supplementary_Data.pdf [file Supplementary_Data.pdf]
